# Supplementary material for: Applying microdroplets as sensors for label-free detection of chemical reactions
Source: Royal Society of Chemistry journal article supplement (doi:10.1039/c2lc20971c), 2012-01-01
Supplement: c2lc20971c.pdf [file c2lc20971c.pdf]

## Supplement

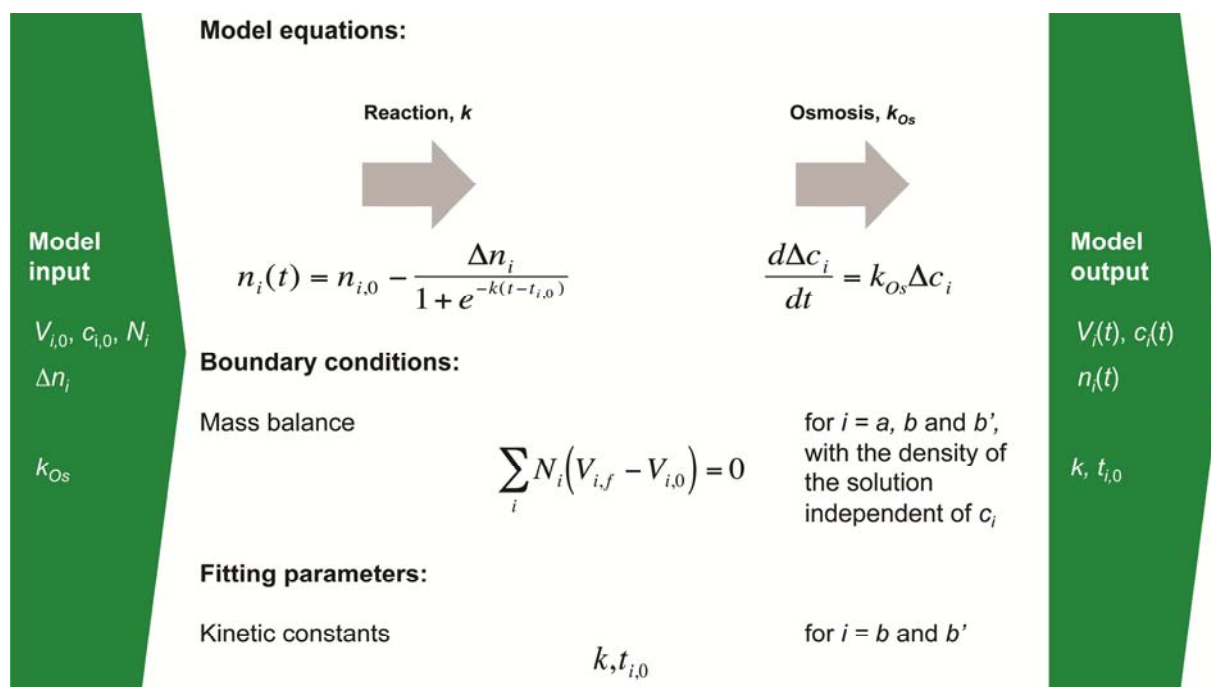

**Supplementary Fig.1:** Schematic of the model. The osmotic process is modeled as  $d(\Delta c) / dt = k_{Os} \times \Delta c$ , the reaction or activity changing the solute concentration is modeled as a basic sigmoid function. The sigmoid function accounts for the plateau when reaching equilibrium and for increasing activity at the beginning, similar to the yeast growth curve observed in bulk.

### **Supplementary Movie: Yeast-induced droplet shrinkage**

A significant size change of droplets is induced by metabolic activity of encapsulated yeast cells. Total time of observation is 16h; scale bar shown on first frame, 30  $\mu\text{m}$ .

Keywords: Microdroplet, cell encapsulation, osmosis, droplet-based microfluidics, droplet shrinkage, droplet sensor, label-free
